# Supplementary material for: Stellate ganglion block reduces inflammation and improves neurological function in diabetic rats during ischemic stroke
Source: PubMed Central journal article supplement — Neural Regen Res. 2022 Feb 8;17(9):1991–7. doi: 10.4103/1673-5374.335162 (PMC8848600; doi:10.4103/1673-5374.335162), 2022-02-08
Supplement: NRR-17-1991_Suppl1.pdf [file NRR-17-1991_Suppl1.pdf]

## OPEN PEER REVIEW REPORT 1

**Name of journal:** Neural Regeneration Research

**Manuscript NO:** NRR-D-21-00565

**Title:** Brain protection by stellate ganglion block during ischemic stroke in diabetic rats: the TLR4/NF- $\kappa$ B pathway and inflammation

**Reviewer's Name:** Eugene Lipov

**Reviewer's country:** USA

### COMMENTS TO AUTHORS

I believe this is an important paper yet a number of clarifications are needed.

- 1) How rats died from SGB? Why?
- 2) The 6 groups needs to be clarified and made much easier to follow, they should also be in the abstract.
- 3) References should be checked for accuracy, ref 10 does NOT discuss anti-inflammatory effect of SGB, yet no references are provided re evidence suggesting as to the statement that SGB produces anti-inflammatory effects such as Yang, Xi, et al. "Impacts of stellate ganglion block on plasma NF- $\kappa$ B and inflammatory factors of TBI patients." International journal of clinical and experimental medicine 8.9 (2015): 15630.
- 4) I believe an explanation for the circadian rhythm effect on SGB should be provided.
